# Supplementary material
Source: PubMed Central journal article supplement (PMC8172466)
Supplement: NIHMS1690090-supplement-1.pdf [file NIHMS1690090-supplement-1.pdf]

## Supplemental Tables

### Supplemental Table S1.

Dose escalation scheme

| Dose level         | Evofosfamide IV (mg/m <sup>2</sup> ) over 60 mins<br>on days 1 and 8 every 21 days × 2 | Ipilimumab IV (mg/kg) over 90<br>mins on day 8 every 21 days × 4 |
|--------------------|----------------------------------------------------------------------------------------|------------------------------------------------------------------|
| -1                 | 320                                                                                    | 3                                                                |
| 1 (starting level) | 400                                                                                    | 3                                                                |
| 2                  | 480                                                                                    | 3                                                                |
| 3                  | 560                                                                                    | 3                                                                |
| 4                  | 640                                                                                    | 3                                                                |

## Supplemental Table S2.

Fifty most differentially expressed genes between responders and non-responders

| Up/downregulated in Non-Responders Pre-Treatment |      |           |       | Up/downregulated in Non-Responders On-Treatment |      |           |       |
|--------------------------------------------------|------|-----------|-------|-------------------------------------------------|------|-----------|-------|
| SPINK13                                          | 5.5  | HLA-DRB5  | -6.52 | ALX1                                            | 8.38 | DDC       | -8.78 |
| GSTM1                                            | 5.21 | INSM1     | -5.77 | HOXC10                                          | 8.16 | GPM6A     | -7.61 |
| CHST9                                            | 5.02 | BTNL8     | -4.61 | SOX2                                            | 7.96 | AC006449. | -7.47 |
| AC016577.                                        | 4.86 | FCGBP     | -4.19 | SLITRK2                                         | 7.55 | ANKS4B    | -6.7  |
| TNNT1                                            | 4.66 | FCER1A    | -3.86 | MAGEA3                                          | 7.23 | ARID3C    | -6.64 |
| MAGEA1                                           | 4.56 | CD1E      | -3.86 | MAGEA6                                          | 7.09 | CXCL6     | -6.37 |
| CYP3A43                                          | 4.48 | LINGO3    | -3.85 | XAGE1B                                          | 6.59 | MPPED1    | -6.2  |
| MEPE                                             | 4.48 | SOD3      | -3.74 | CSAG1                                           | 6.55 | MROH2A    | -5.92 |
| AARD                                             | 4.34 | FAM159A   | -3.71 | HOXD8                                           | 6.53 | KNDC1     | -5.68 |
| RPRML                                            | 4.27 | C19orf35  | -3.35 | KRT75                                           | 6.5  | CLDN14    | -5.52 |
| LY6K                                             | 4.02 | NLGN4Y    | -3.34 | XAGE1A                                          | 6.44 | CFTR      | -5.24 |
| C1QTNF9B                                         | 3.97 | CLEC17A   | -3.25 | MCIDAS                                          | 6.28 | HLF       | -5.23 |
| MAPK10                                           | 3.93 | SLC34A3   | -3.1  | EN1                                             | 6.13 | PDIA2     | -5.08 |
| SYT16                                            | 3.78 | RHOH      | -3.05 | CHL1                                            | 5.97 | ANKRD30B  | -4.84 |
| NME5                                             | 3.74 | ADGRL3    | -2.78 | FBLL1                                           | 5.84 | NRG1      | -4.8  |
| CES3                                             | 3.62 | LFNG      | -2.74 | CXorf49B                                        | 5.68 | ASIC2     | -4.59 |
| CCNO                                             | 3.54 | TBXAS1    | -2.73 | CXorf49                                         | 5.68 | RELN      | -4.4  |
| A2ML1                                            | 3.44 | TMEM163   | -2.7  | SHOX2                                           | 5.5  | KANK4     | -4.34 |
| SFTA3                                            | 3.36 | P2RY14    | -2.52 | HOXD4                                           | 5.4  | NDST3     | -4.31 |
| GLOD5                                            | 3.36 | FMOD      | -2.5  | SOSTDC1                                         | 5.35 | MYOM2     | -4.22 |
| DDX25                                            | 3.36 | CD38      | -2.48 | HBM                                             | 5.23 | NCAM2     | -4.21 |
| LRP2                                             | 3.3  | RNF224    | -2.42 | BMP7                                            | 4.92 | SLC16A10  | -4.14 |
| ROPN1B                                           | 3.27 | ADRA2A    | -2.37 | HOXC9                                           | 4.75 | DCDC2     | -4.07 |
| MAPK15                                           | 3.24 | C16orf54  | -2.32 | DCLK1                                           | 4.36 | MAB21L3   | -4.02 |
| KAZN                                             | 3.16 | LY86      | -2.31 | NSG1                                            | 4.3  | USH2A     | -3.99 |
| ABCC12                                           | 3.13 | PAQR8     | -2.16 | A2ML1                                           | 4.21 | HPGD      | -3.98 |
| GPR37                                            | 3.05 | PTPRCAP   | -2.02 | TTC39A                                          | 4.09 | SLC19A3   | -3.95 |
| HRSP12                                           | 2.78 | FERMT3    | -1.99 | GJC1                                            | 4.02 | CFAP57    | -3.94 |
| VSTM2L                                           | 2.54 | MEGF6     | -1.87 | ANK2                                            | 3.86 | KLHL13    | -3.84 |
| SLC13A3                                          | 2.54 | MTRNR2L8  | -1.82 | LINGO1                                          | 3.84 | LRRC4C    | -3.28 |
| SLC7A2                                           | 2.35 | ACKR4     | -1.81 | BUB1                                            | 3.69 | NMNAT3    | -3.23 |
| SPECC1                                           | 2.29 | PM20D1    | -1.74 | CDKN3                                           | 3.52 | AKR1C3    | -3.23 |
| ZNF662                                           | 2.12 | SMPD3     | -1.73 | WNK4                                            | 3.51 | PRKAA2    | -3.22 |
| CHCHD6                                           | 2    | GLIPR2    | -1.67 | NELL2                                           | 3.48 | KAAG1     | -3.15 |
| MTFR1                                            | 1.99 | SEMA4A    | -1.66 | AIF1L                                           | 3.42 | MAGI2     | -3.1  |
| FSBP                                             | 1.99 | LAG3      | -1.63 | SAMD3                                           | 3.38 | RPH3AL    | -3.09 |
| PHLPP1                                           | 1.96 | CXCR4     | -1.59 | CXCL9                                           | 3.38 | KLHL31    | -2.99 |
| BNIP1                                            | 1.95 | MZT2A     | -1.56 | SLC12A5                                         | 3.34 | GLTPD2    | -2.85 |
| TSPAN6                                           | 1.94 | ZNF671    | -1.54 | EBF1                                            | 3.34 | ZNF140    | -2.81 |
| MIPEP                                            | 1.93 | C5orf56   | -1.54 | TWIST1                                          | 3.3  | ST20      | -2.58 |
| PSAT1                                            | 1.9  | GATA6     | -1.46 | ARHGAP11                                        | 3.24 | FBP1      | -2.48 |
| SNX25                                            | 1.89 | ICOSLG    | -1.43 | TCF7L1                                          | 3.11 | MPST      | -2.25 |
| TBX6                                             | 1.84 | GMIP      | -1.42 | LZTS1                                           | 3.09 | ACAA2     | -2.24 |
| ADHFE1                                           | 1.81 | CBX7      | -1.41 | ASB2                                            | 3.08 | OVGP1     | -2.18 |
| HPRT1                                            | 1.8  | IRF7      | -1.38 | FAM107A                                         | 3.06 | NPB       | -2.16 |
| TMEM99                                           | 1.76 | KIF21B    | -1.38 | CXorf36                                         | 3.01 | SERINC2   | -2.14 |
| FBXO32                                           | 1.7  | DGKZ      | -1.37 | FABP4                                           | 2.99 | AIFM2     | -2.13 |
| GCAT                                             | 1.7  | ZC3H12A   | -1.33 | HOPX                                            | 2.93 | LYNX1     | -2.11 |
| RHOT1                                            | 1.68 | PCDHB4    | -1.33 | KIF23                                           | 2.75 | PECR      | -2.11 |
| ZNF572                                           | 1.67 | CH507-9B2 | -1.32 | CDC45                                           | 2.74 | CCBL1     | -2.07 |

Supplemental Figures

Supplemental Figure S1

TH-CR-417 PK parameters: no significant difference between the two highest dose groups

|                                       | N | C <sub>max</sub><br>(µg/mL) | T <sub>max</sub><br>(hr) | AUC <sub>last</sub><br>(hr*µg/mL) | AUC <sub>inf</sub><br>(hr*µg/mL) | T <sub>½</sub><br>(hr) |
|---------------------------------------|---|-----------------------------|--------------------------|-----------------------------------|----------------------------------|------------------------|
| Evofosfamide at 560 mg/m <sup>2</sup> |   |                             |                          |                                   |                                  |                        |
| Evofosfamide (Prodrug)                | 7 | 9.40                        | 1                        | 11.9                              | 12.1                             | 0.725                  |
| Br-IPM (Active Moiety)                | 7 | 0.179                       | 1                        | 0.228                             | NC                               | NC                     |
| Evofosfamide at 640 mg/m <sup>2</sup> |   |                             |                          |                                   |                                  |                        |
| Evofosfamide (Prodrug)                | 5 | 8.87                        | 1                        | 10.6                              | 10.7                             | 0.729                  |
| Br-IPM (Active Moiety)                | 4 | 0.182                       | 1                        | 0.203                             | NC                               | NC                     |

\* Data presented are geometric means

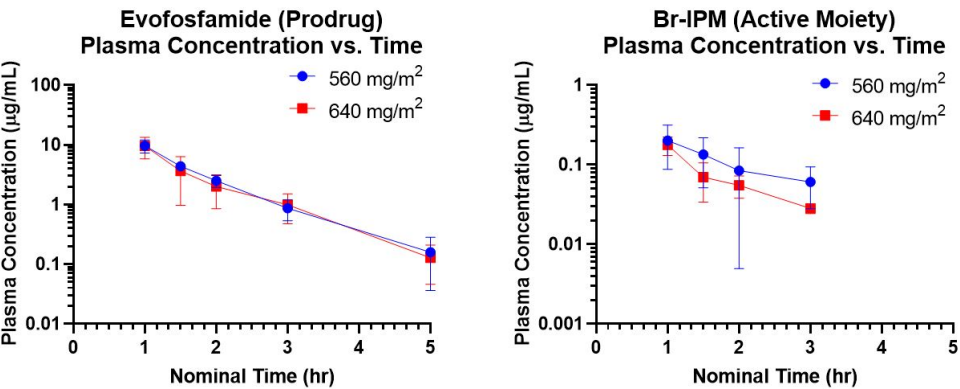

Supplemental Figure S1.

**Evofosfamide serum pharmacokinetics.** Serial blood samples were collected from patients receiving evofosfamide at either 560 mg/m<sup>2</sup> or 640 mg/m<sup>2</sup> at the time points shown and analyzed for concentration of evofosfamide, the prodrug, and of bromo-isophosphoramidate mustard (Br-IPM), the active moiety.

## Supplemental Figure S2

### A. Population gating

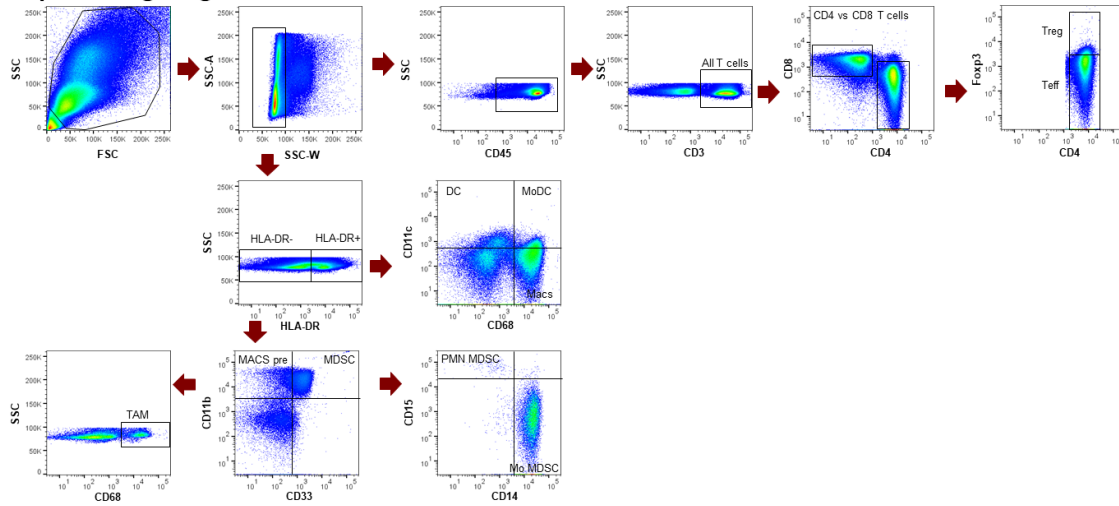

### B. CD8 T cell phenotype

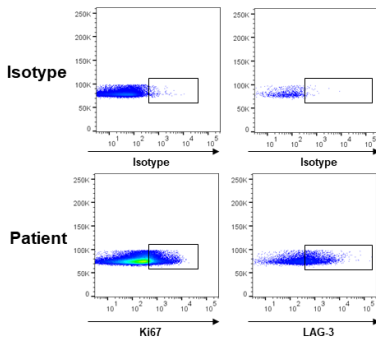

### C. DC phenotype

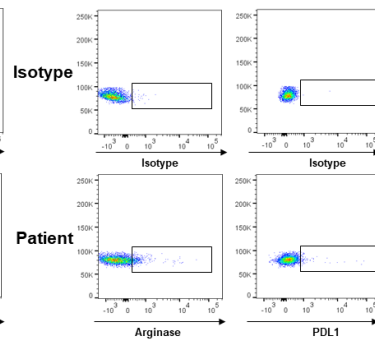

### D. MoDC phenotype

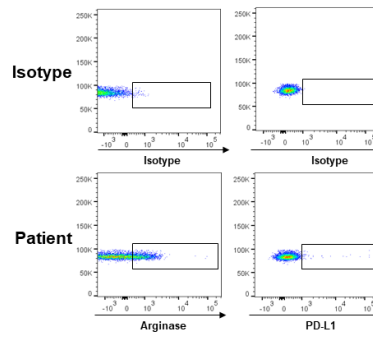

## Supplemental Figure S2.

**Flow cytometry gating scheme for peripheral blood mononuclear cells. A)** Debris and doublets were eliminated. CD3<sup>+</sup> T cells were subdivided into CD8<sup>+</sup>CD4<sup>-</sup> cytotoxic T cells and CD4<sup>+</sup>CD8<sup>-</sup> T cells, which were then subdivided into CD4<sup>+</sup>FOXP3<sup>+</sup> T<sub>reg</sub> and CD4<sup>+</sup>FOXP3<sup>-</sup> T<sub>eff</sub>. Dendritic cells were identified as HLA<sup>-</sup>DR<sup>+</sup>CD11c<sup>+</sup>CD68<sup>-</sup> while monocytic dendritic cells were HLA<sup>-</sup>DR<sup>+</sup>CD11c<sup>+</sup>CD68<sup>+</sup>. Myeloid-derived suppressor cells (MDSC) were defined as HLA<sup>-</sup>DR<sup>-</sup>CD11b<sup>+</sup>CD33<sup>+</sup> and further subdivided into PMN MDSC (CD14<sup>-</sup>CD15<sup>+</sup>), Mo MDSC (CD15<sup>-</sup>CD14<sup>+</sup>), and DN tumor-associated macrophages (CD14<sup>-</sup>CD15<sup>-</sup>). Tumor-associated macrophages were identified as HLA<sup>-</sup>DR<sup>-</sup>CD11b<sup>+</sup>CD33<sup>-</sup>CD68<sup>+</sup>. **B-D)** Representative flow plots showing **B)** Ki67 (left) and Lag3 (right) staining in peripheral blood CD8<sup>+</sup> T cells, **C)** arginase 1 (left) and PD-L1 (right) staining in circulating dendritic cells, and **D)** Arginase 1 (left) and PD-L1 (right) staining in circulating monocytic dendritic cells relative to isotype control populations.

### Supplemental Figure S3

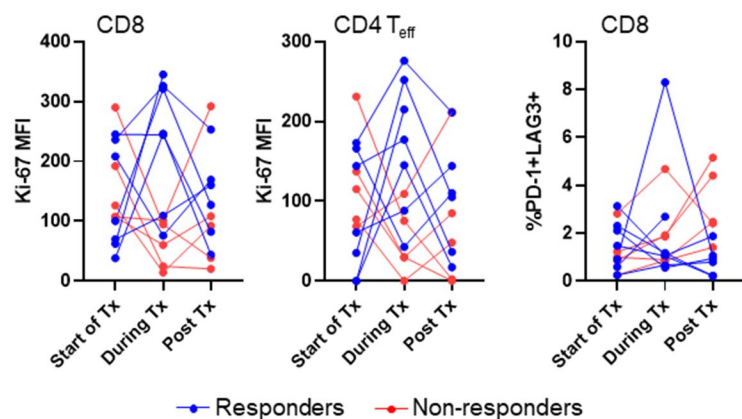

### Supplemental Figure S3.

**Changes in circulating T cell phenotype due to treatment.** Peripheral blood mononuclear cells were isolated from patients prior to, during, and post treatment and assessed for immune composition and function by 20-color flow cytometry. Proliferation of CD8 and CD4 effector T cells was analyzed by Ki-67 expression and is shown at each time point for each patient. The percentage of exhausted PD-1<sup>+</sup>LAG-3<sup>+</sup> CD8 T cells is also shown.

## Supplemental Figure S4

### A. Population gating

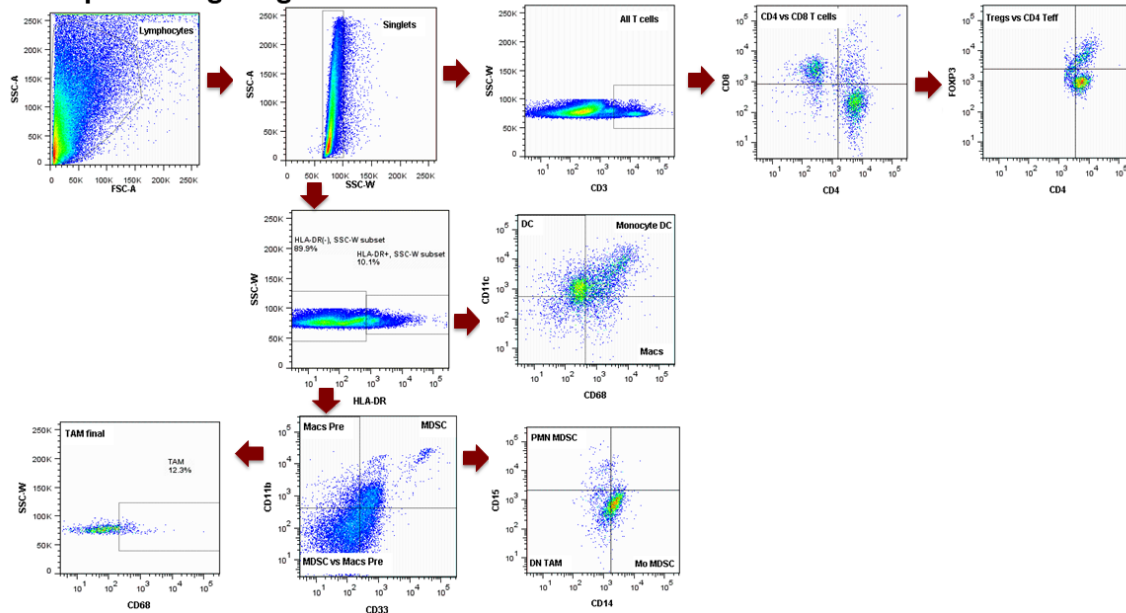

### B. T cell phenotype

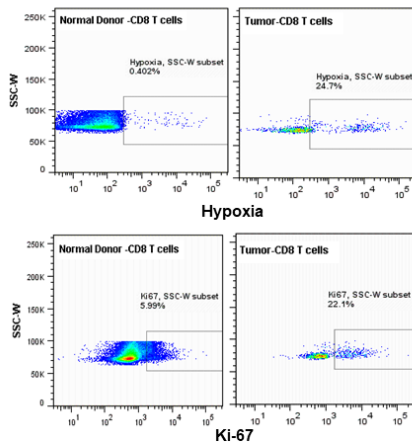

### C. DC phenotype

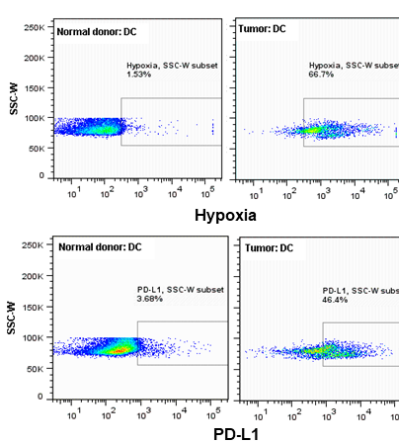

### D. Myeloid phenotype

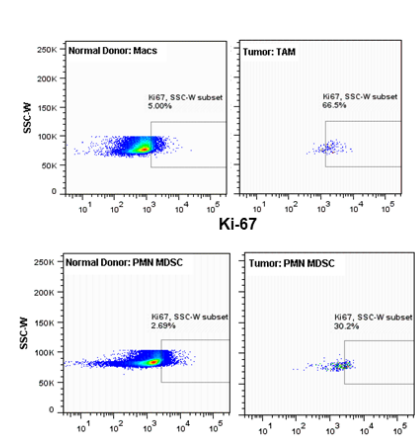

## Supplemental Figure S4.

**Flow cytometry gating scheme for tumor biopsies.** **A)** Debris and doublets were eliminated.  $CD3^+$  T cells were subdivided into  $CD8^+CD4^-$  cytotoxic T cells and  $CD4^+CD8^-$  T cells, which were then subdivided into  $CD4^+FOXP3^+$   $T_{reg}$  and  $CD4^+FOXP3^-$   $T_{eff}$ . Dendritic cells were identified as  $HLA-DR^+CD11c^+CD68^-$  while monocyctic dendritic cells were  $HLA-DR^+CD11c^+CD68^+$ . Myeloid-derived suppressor cells (MDSC) were defined as  $HLA-DR^-CD11b^+CD33^+$  and further subdivided into PMN MDSC ( $CD14^-CD15^+$ ), Mo MDSC ( $CD15^-CD14^+$ ), and DN tumor-associated macrophages ( $CD14^-CD15^-$ ). Tumor-associated macrophages were identified as  $HLA-DR^-CD11b^+CD33^-CD68^+$ . **B-D)** Representative flow plots showing **B)** hypoxia (top) and Ki-67 (bottom) staining in tumor-infiltrating  $CD8^+$  T cells, **C)** hypoxia (top) and PD-L1 (bottom) staining in tumor-infiltrating dendritic cells, and **D)** Ki-67 staining in tumor-associated macrophages (top) and PMN MDSC (bottom) relative to control populations in peripheral blood mononuclear cells from a healthy donor.

## Supplemental Figure S5

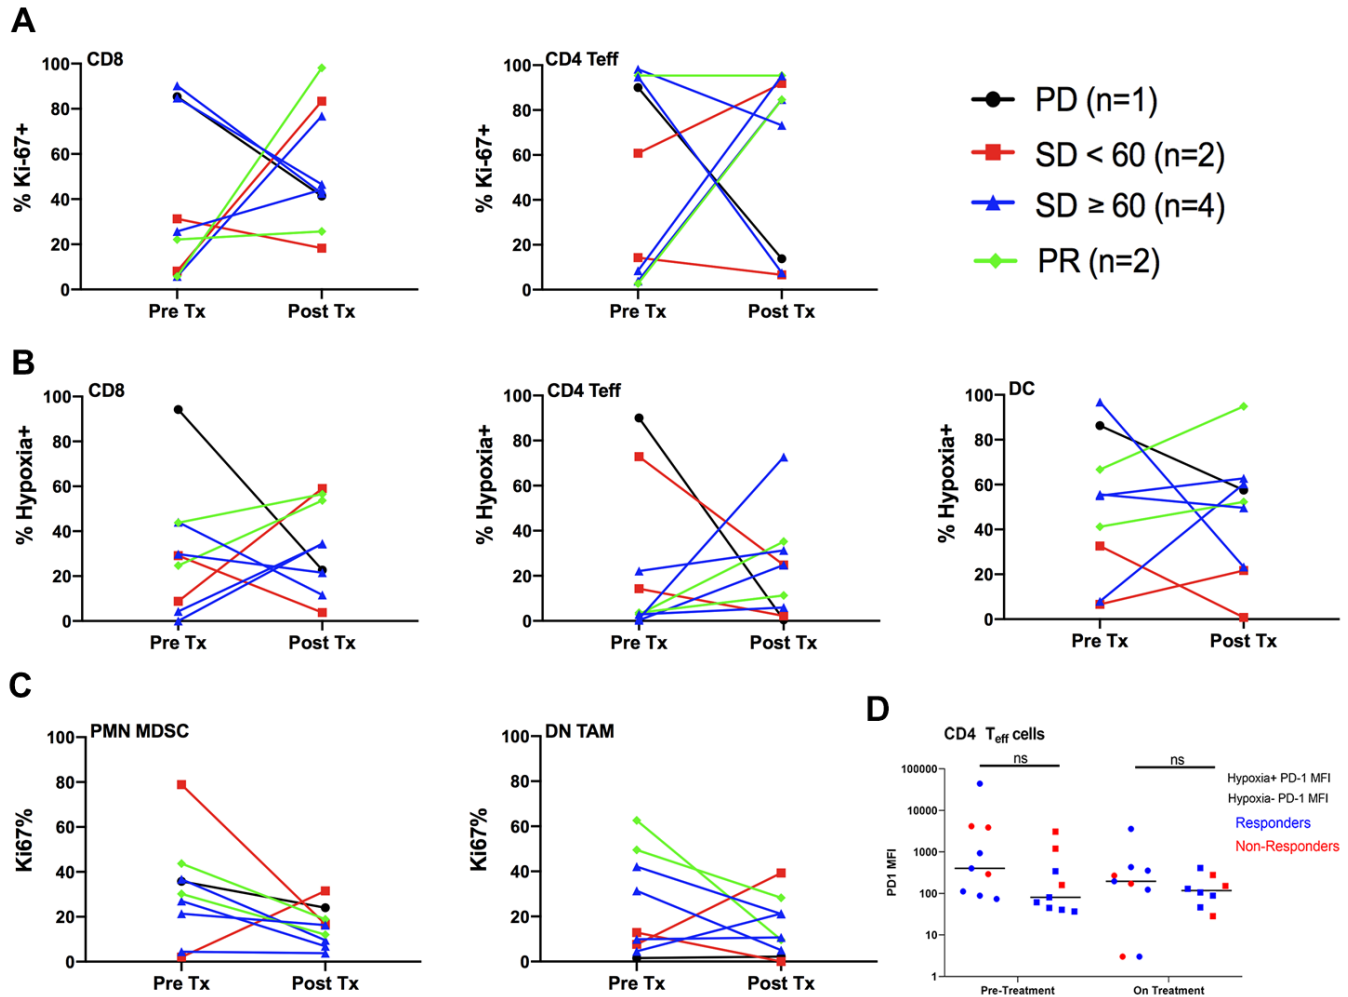

## Supplemental Figure S5.

**Tumor hypoxia and immune function in individual patients.** Patient biopsies were obtained at baseline and at week 7, and assessed for hypoxia and immune composition and function by 20-color flow cytometry. Data are shown for individual patients, color-coded based on response. **A)** Proliferation of tumor-infiltrating CD8 and CD4 effector T cells was analyzed based on Ki-67 expression. **B)** Patients were given oral pimonidazole 5-24 hours prior to biopsy to evaluate tumor hypoxia using anti-pimonidazole antibody conjugated to the fluorescent dye ATTO 594 (Hypoxyprobe), and densities of T cells and dendritic cells in hypoxic areas were assessed. **C)** Proliferation of immune-suppressive CD33<sup>+</sup>CD14<sup>+</sup>CD15<sup>-</sup> tumor-associated macrophages was evaluated by Ki-67 expression. **D)** Hypoxia-exposed (pimonidazole<sup>+</sup>, circles) vs non-hypoxia resident (pimonidazole<sup>-</sup>, squares) CD4 effector T cells were analyzed for PD-1 expression pre- and on-treatment (cycle 3, day 8).

Supplemental Figure S6

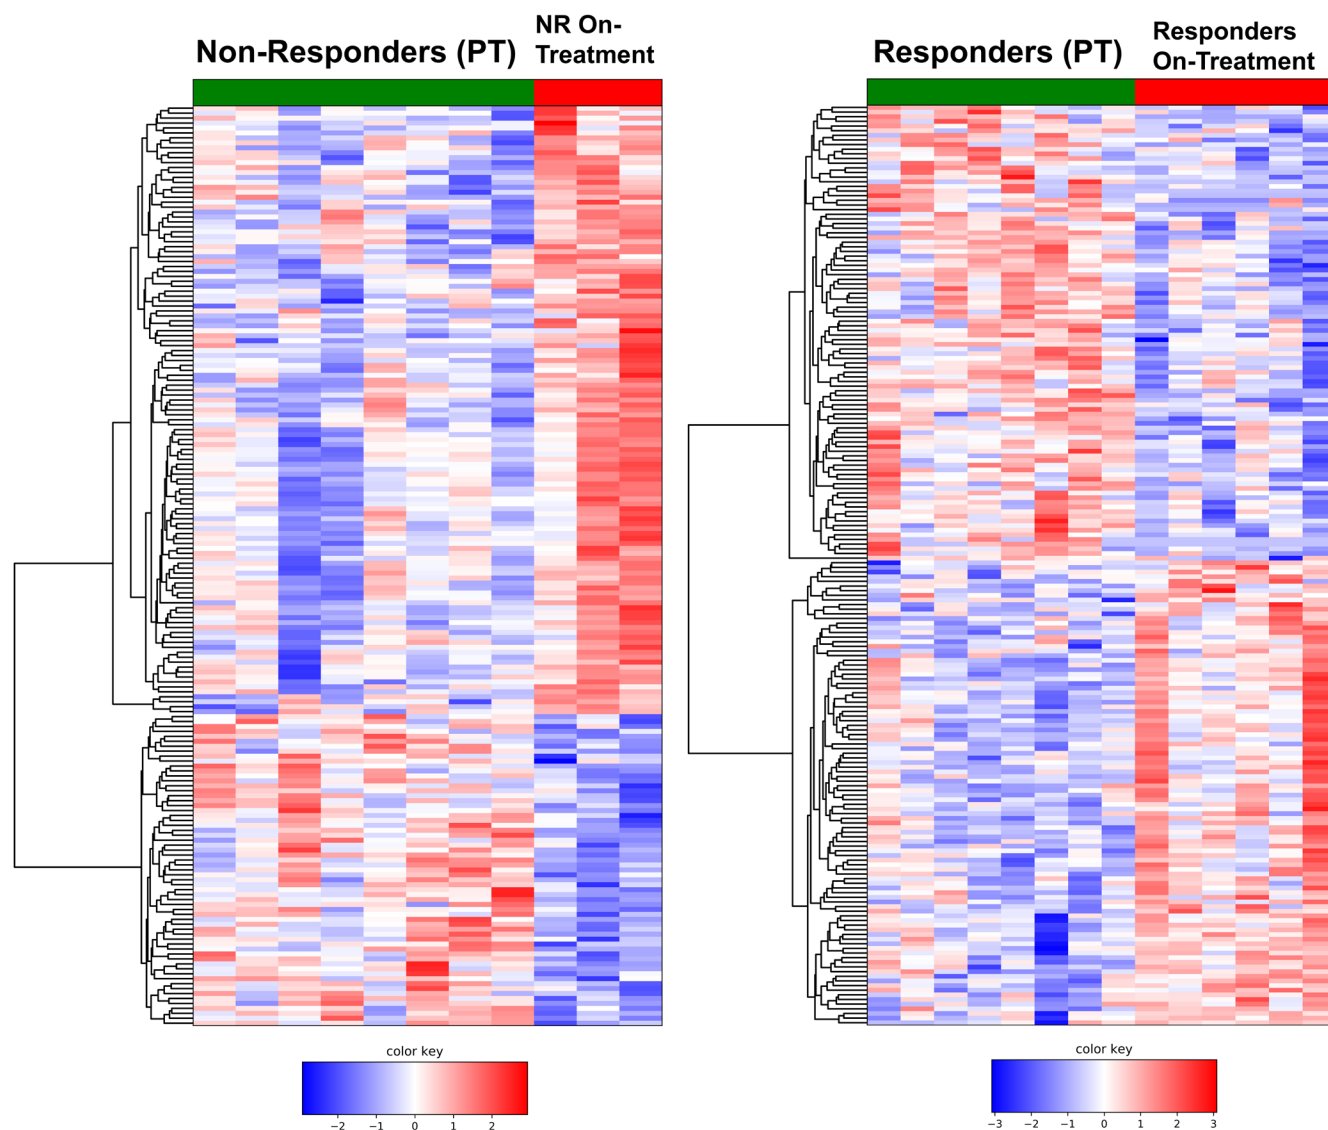

Supplemental Figure S6.

**Changes in gene expression in response to evofosfamide + ipilimumab therapy.** Tumor biopsies were collected pre-treatment and on-treatment (cycle 3, day 8), and RNA was isolated using All-prep (Qiagen). RNA sequencing was performed by Avera and bioinformatic analysis was performed by the Baylor College of Medicine Multi-omics Core.
